# Supplementary material
Source: PubMed Central journal article supplement (PMC4241021)
Supplement: NIHMS630104-supplement-1.pdf [file NIHMS630104-supplement-1.pdf]

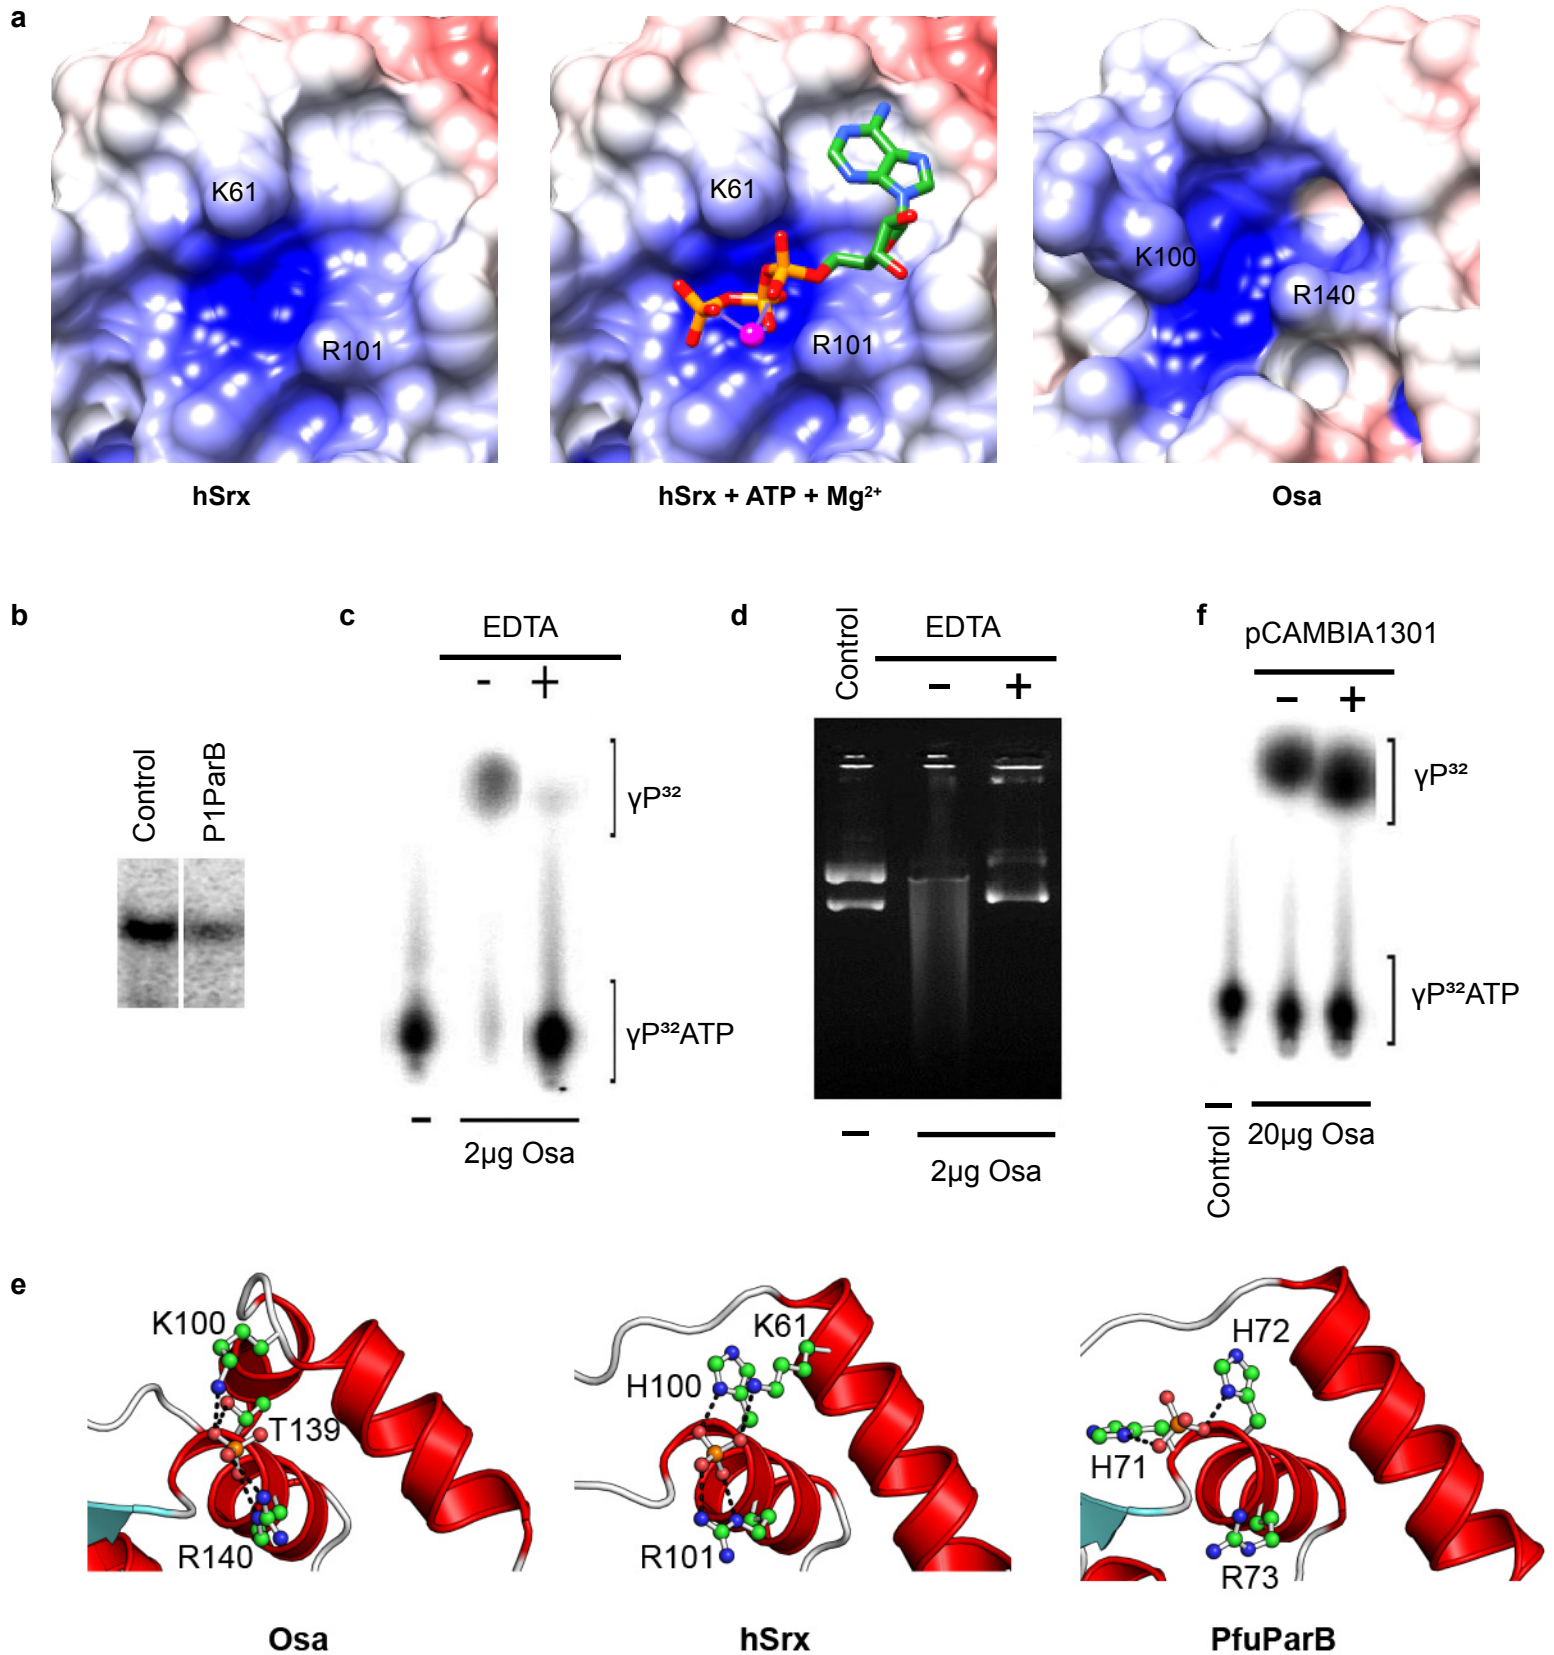

**Supplementary figure 2:** Comparison of active site of hSrx with the predicted functional site of Osa, and associated biochemical activities. (a) ATP binding pocket of hSrx without ATP, with bound ATP in the active site of hSrx (PDB:3cyi) is shown along with the predicted ATP binding pocket of Osa. (b) DNase activity of P1ParB using 90-mer ssDNA substrate. (c) ATPase and (d) DNase activity of Osa in the presence and absence of EDTA. (e) Conserved phosphate binding site in the crystal structures of ParB/Srx superfamily proteins are shown. (f) ATPase activity of Osa in absence or presence of 1 μg of plasmid pCAMBIA1301 in the reaction mix.

Supplementary Figure 3 (arockiasamy)

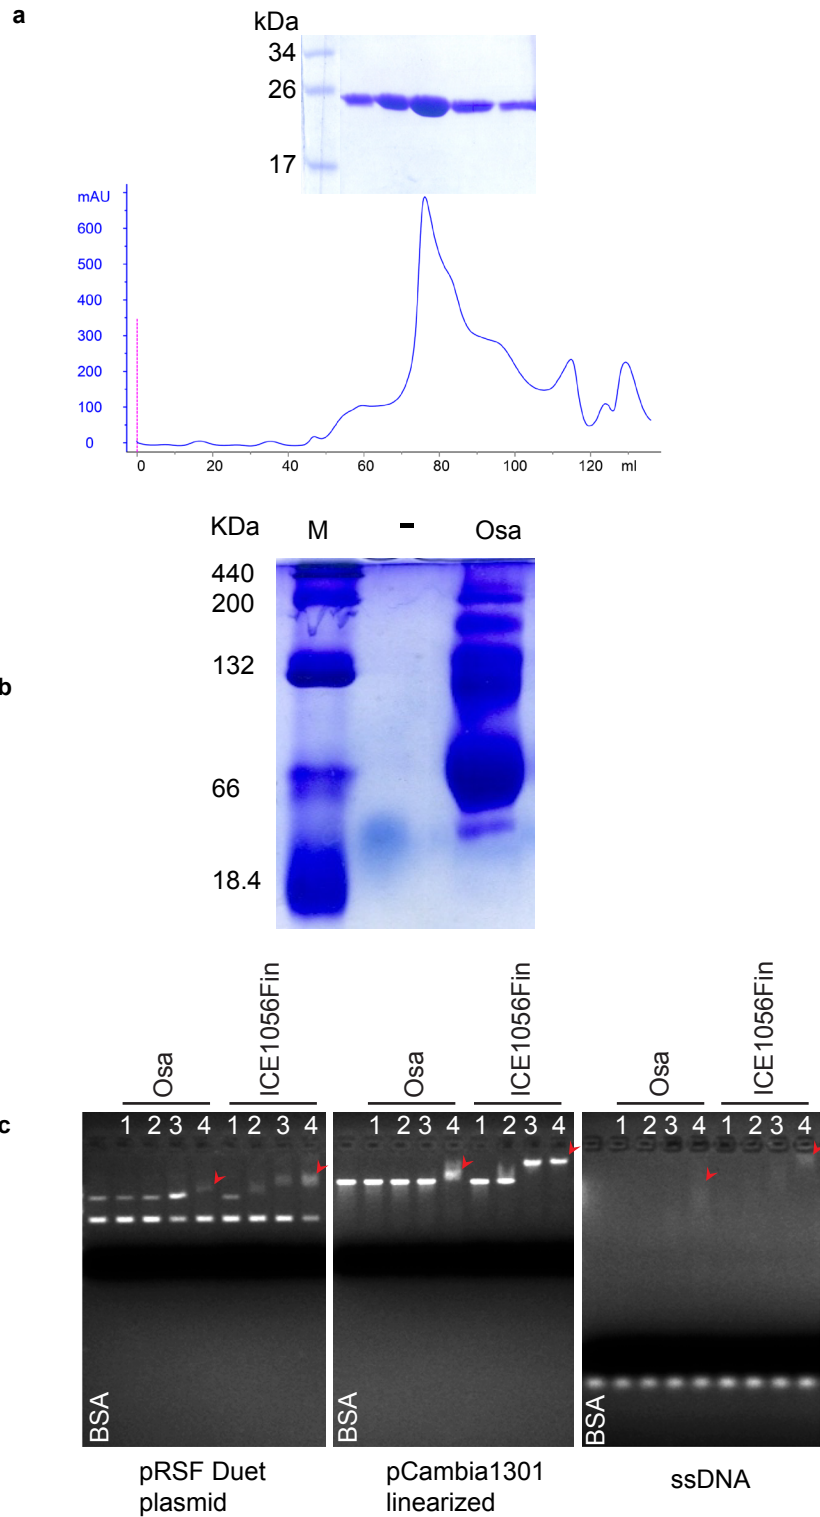

**Supplementary figure 3:** Multimerization is conserved across the ParB/Srx superfamily. **(a)** Gel filtration chromatogram showing multiple peaks containing pure Osa, which was purified to homogeneity even before loading onto Superdex-S200 column. Corresponding eluted fractions were run on SDS-PAGE (inlet). **(b)** Blue-Native PAGE of purified Osa shows multimerization in the absence of substrate DNA. **(c)** Gel-shift assay with Osa and Ice1056Fin showing supershifting of DNA seen with uncut plasmid (pRSF-Duet1) as non-specific DNA, linearized dsDNA (pCambia1301) with T-DNA borders, and 90mer ssDNA with left and right borders substrates. The reaction carried out for 15 minutes on ice and ran on 1% and 2.5% Agarose gels for dsDNA and ssDNA, respectively. Samples loaded in lanes 1-4 had 0.5, 1, 2.5, 10  $\mu$ g, respectively, of corresponding FIN proteins. The concentrations used were 50 and 500 ng for dsDNA and ssDNA, respectively.

Supplementary Figure 4 (arockiasamy)

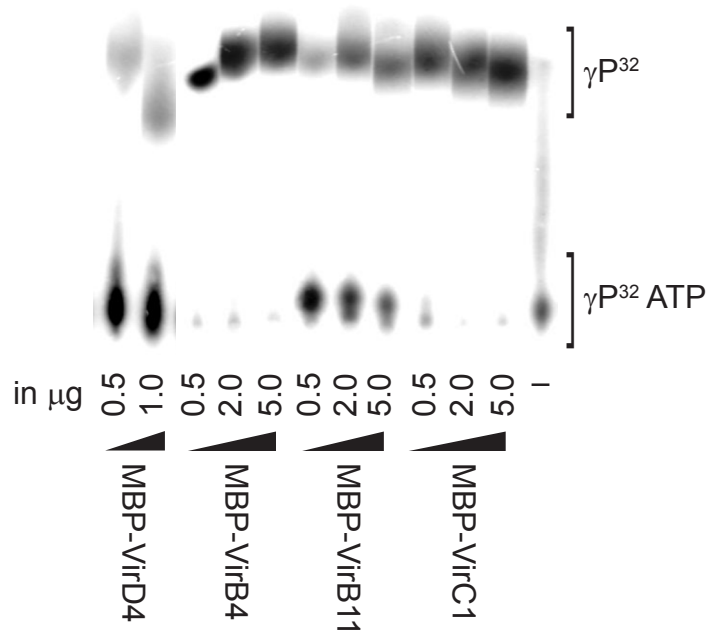

**Supplementary figure 4:** ATPase activity of purified VirB/D4 T4SS components; VirD4, VirB4, VirB11 and the relaxosome ATPase VirC1.  $[\gamma\text{-}^{32}\text{P}]\text{ATP}$  was used as substrate in the assay and the reaction products were run on TLC.

a OSA-associated

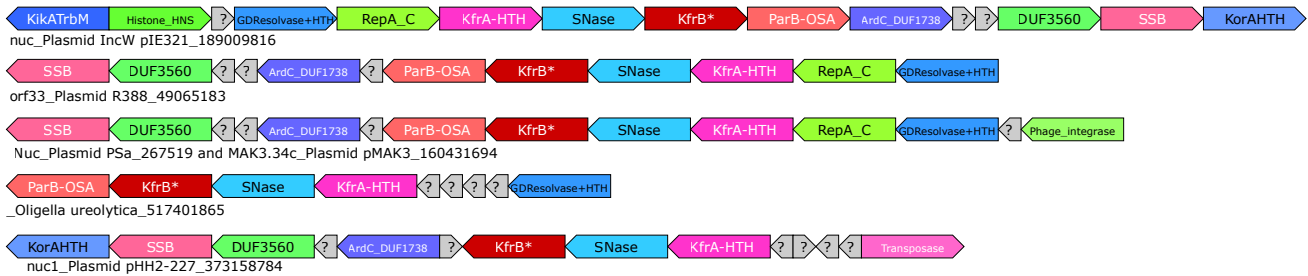

T4SS and Relaxase (RCRE) system associated

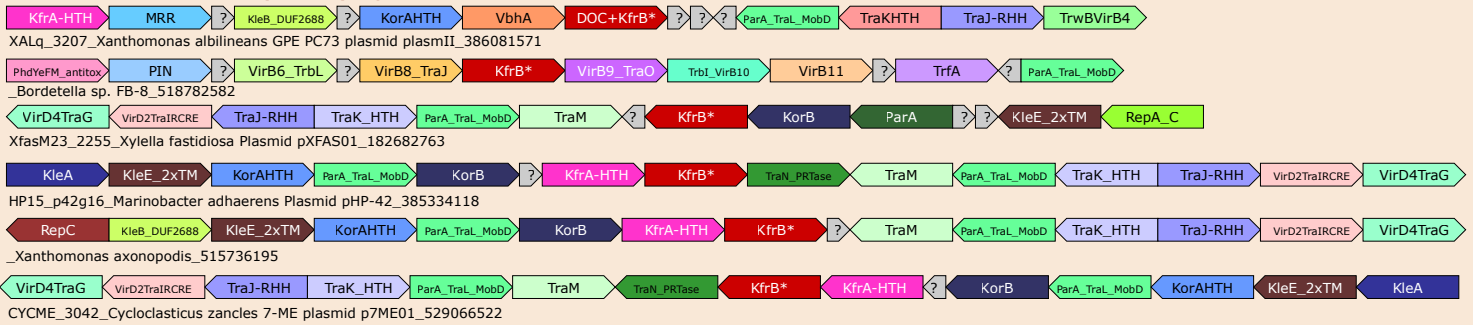

T4SS associated

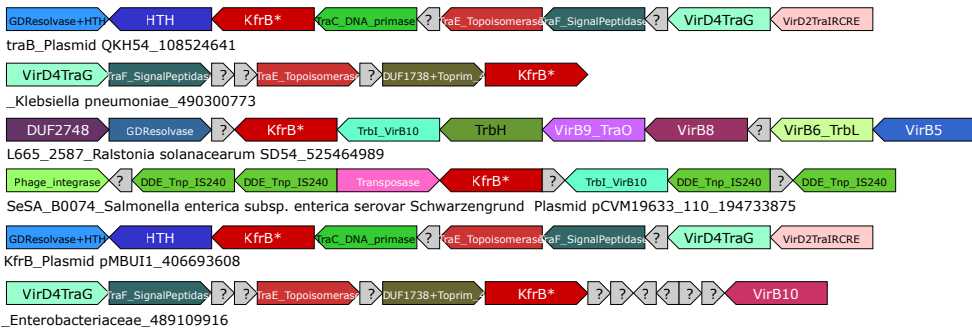

PTox3, T4SS and Relaxase (RCRE) associated

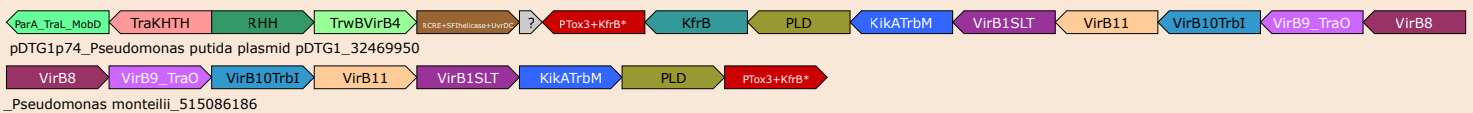

PTox2 and T4SS associated

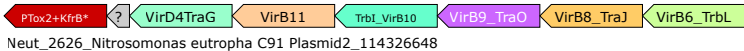

PTox1-associated or fused and T4SS and Mob associated

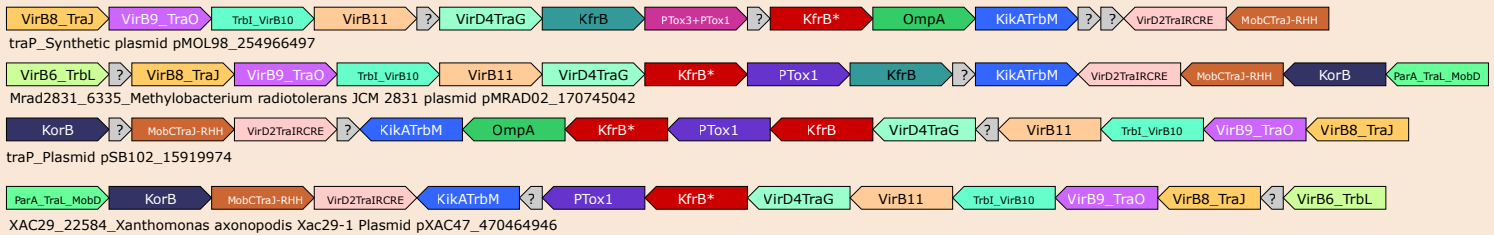

Fused to PTox1

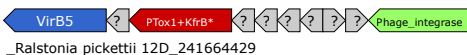

KfrB fused to Zeta toxin and in the neighborhood of T4SS

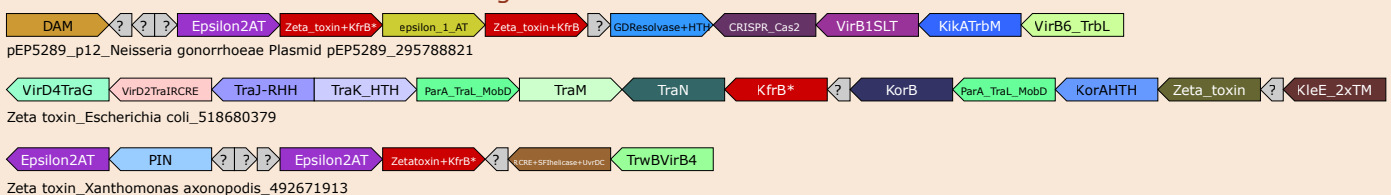

### Relaxase (RCRE) associated

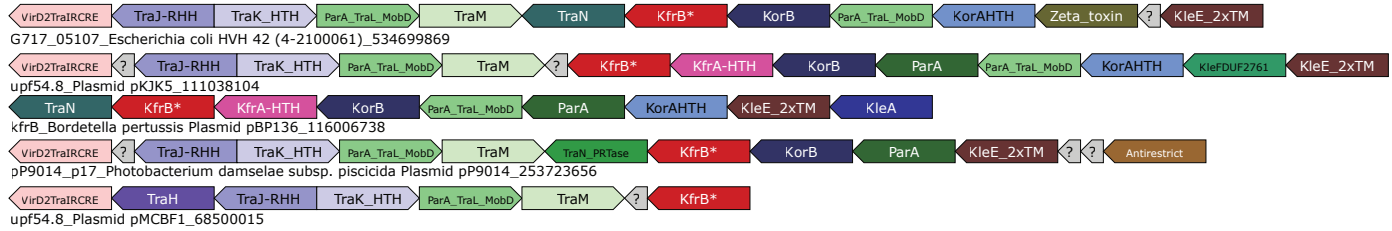

### Fused to Zeta toxin

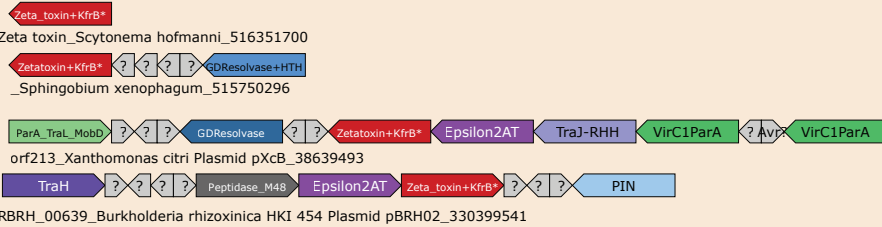

### ZetaToxin and Relaxase (RCRE) associated

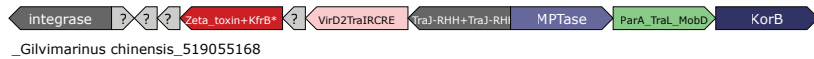

### Multiple TA loci

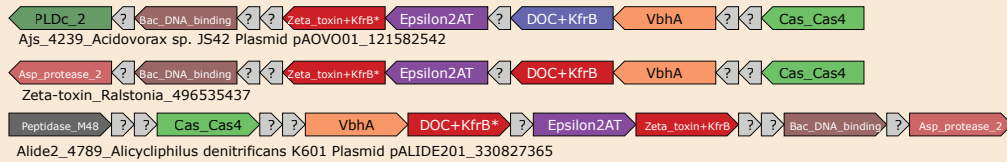

### DOC associated in Toxin-Antitoxin systems with VbhA as antitoxin, also with Relaxase (RCRE)s

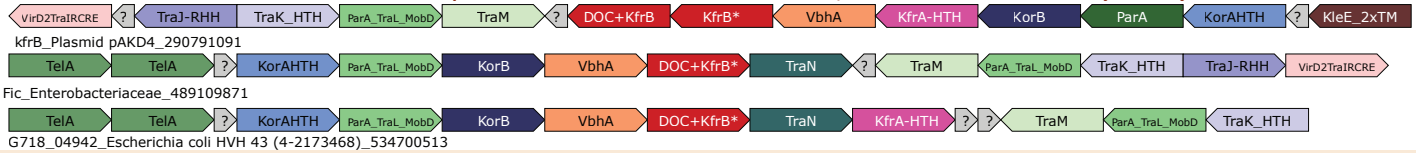

### DOC associated, most in a TA system with VbhA as antitoxin

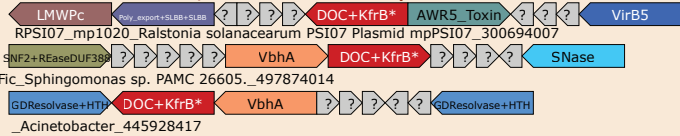

### abhydrolase associated, most in a TA system with VbhA

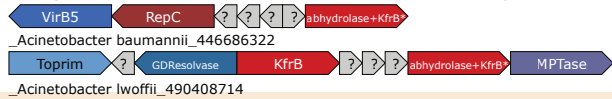

### TA-system with HEPN

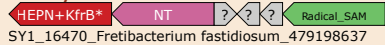

### Fused to DCM and DAM and helicase. Note the several tandem KfrB domain containing genes

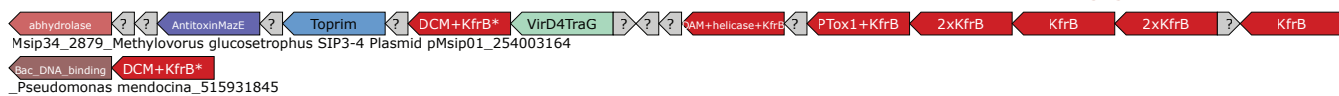

### Fused to Toprim and in the neighborhood of a Relaxase (RCRE)

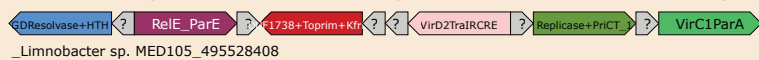

### Fused to DUF4314, which is also associated with DNA modification systems

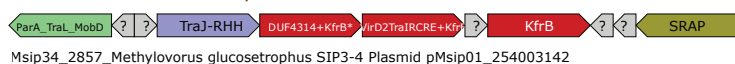

Supplementary Figure 5b (arockiasamy)

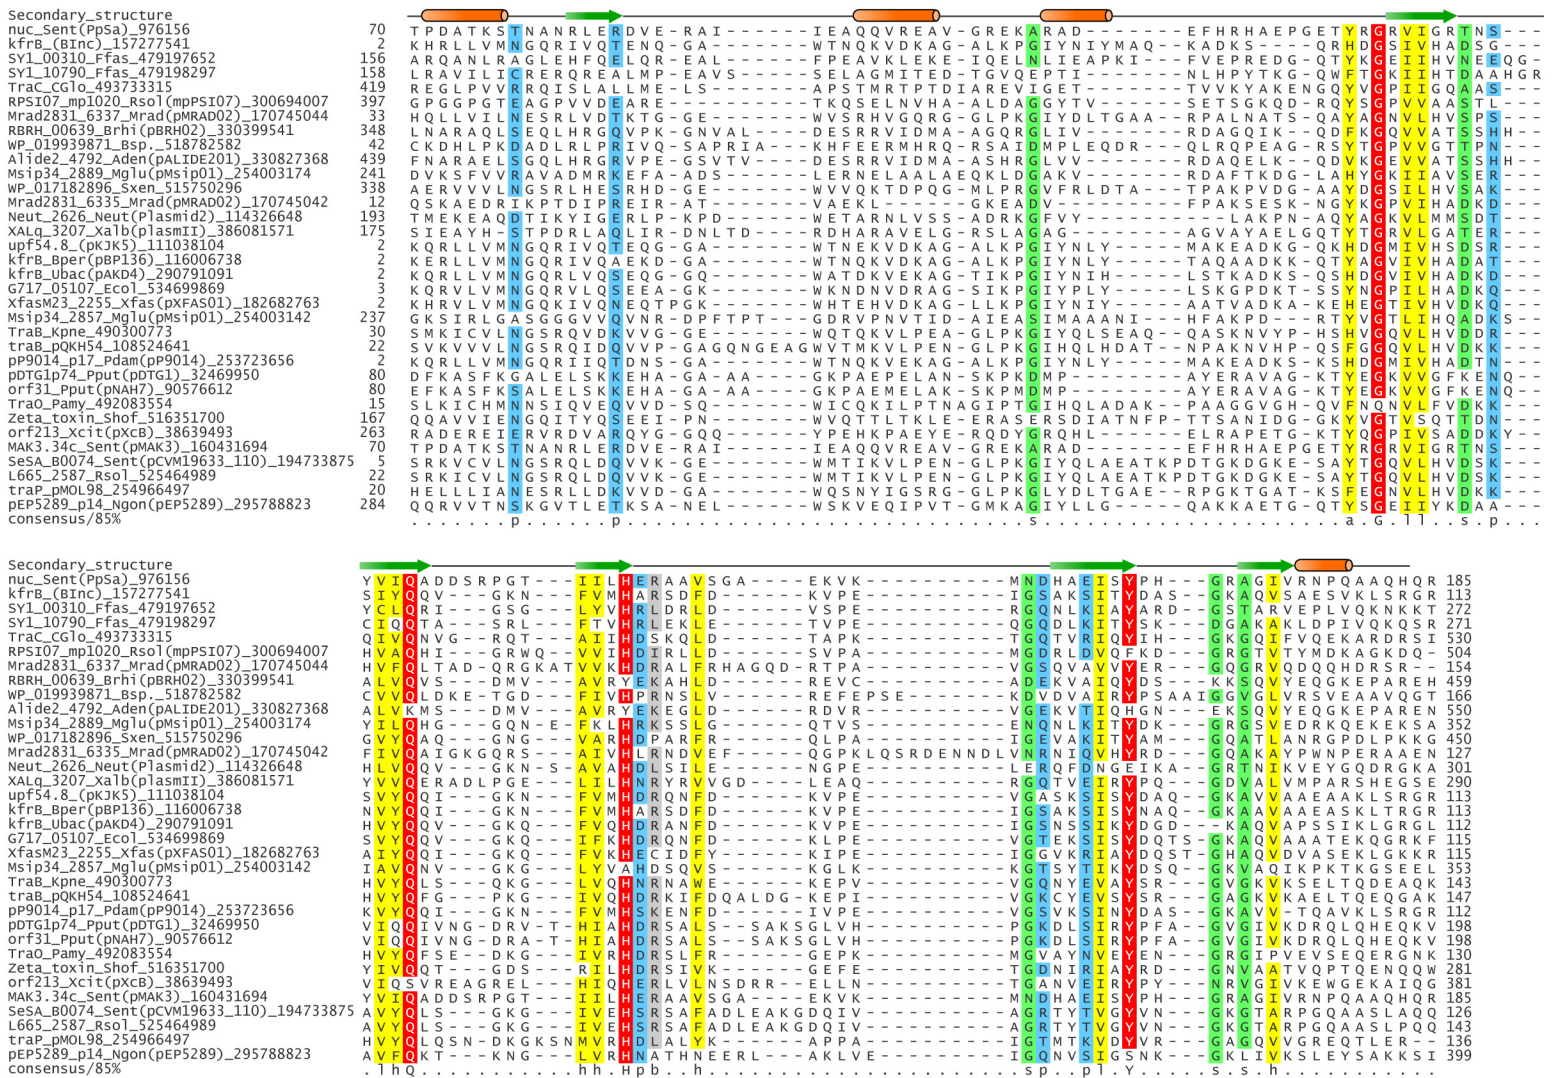

**Supplementary figure 5:** Operon associations of KfrB and multiple sequence alignment. In the gene neighborhood illustrations (a), genes are shown as box-arrows with the arrow head pointing to the 3' gene in the gene neighborhood. KfrB containing genes are colored red. Operons are labeled with gene names, species abbreviations and/or plasmid name and Genbank index numbers (GI) of the KfrB containing genes (marked with asterisk in the gene neighborhood). Gene neighborhoods are grouped based on similarity of associations. In the alignment (b), proteins are denoted by their gene names, species abbreviations and Genbank index numbers (GI). Additionally those derived from plasmids are denoted with the plasmid name in brackets. The alignment was colored at 85% consensus. Secondary structure elements are shown above the alignment. The consensus abbreviations and colouring scheme are as in Supplementary figure 1c. Species abbreviations are as follows: Aden : *Alicyclophilus denitrificans*; Binc : *Birmingham IncP-alpha*; Bper : *Bordetella pertussis*; Brhi : *Burkholderia rhizoxinica*; Bsp. : *Bordetella* sp.; CGlo : *Candidatus Glomeribacter*; E : Enterobacteriaceae; Ecol : *Escherichia coli*; Ffas : *Fretibacterium fastidiosum*; Mglu : *Methylovorus glucosetrophus*; Mrad : *Methylobacterium radiotolerans*; Neut : *Nitrosomonas eutropha*; Ngon : *Neisseria gonorrhoeae*; Pamy : *Pseudomonas amygdali*; Pdam : *Photobacterium damselae*; PpSa : Plasmid pSa; Pput : *Pseudomonas putida*; Rsol : *Ralstonia solanacearum*; Sent : *Salmonella enterica*; Shof : *Scytonema hofmanni*; Spla : *Synthetic plasmid*; Sxen : *Sphingobium xenophagum*; Ubac : uncultured bacterium; Xalb : *Xanthomonas albilineans*; Xcit : *Xanthomonas citri*; Xfas : *Xylella fastidiosa*.

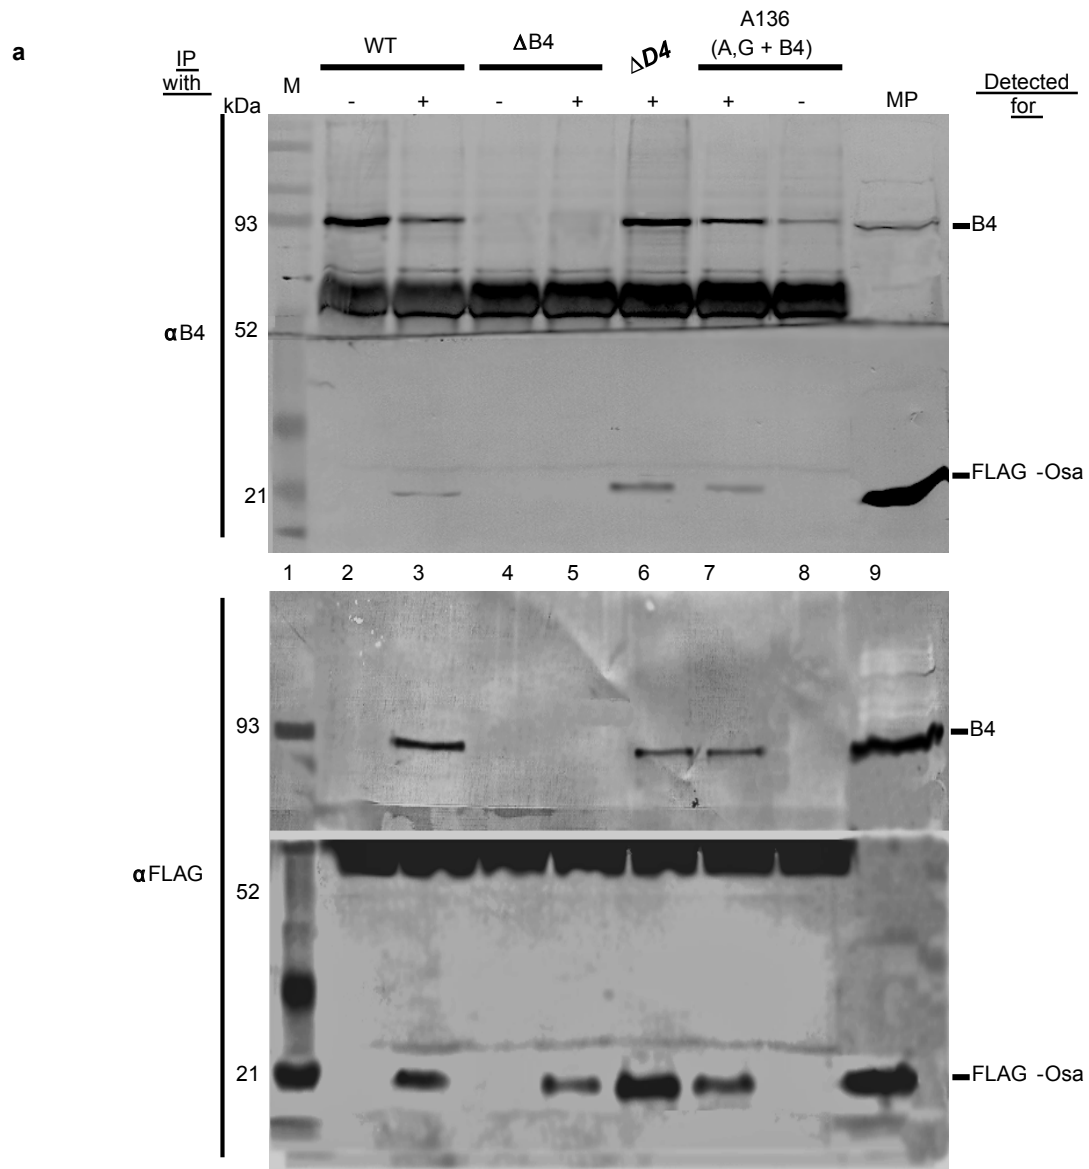

**Supplementary Figure 6a:** Uncropped blots of Fig. 4a showing that Osa interacts with VirB11 independent of T4S machine and VirD4. After blocking, membranes i) and ii) were cut into two portions. The top and bottom portions of both i) and ii) were detected for VirB4 and FLAG-Osa respectively.



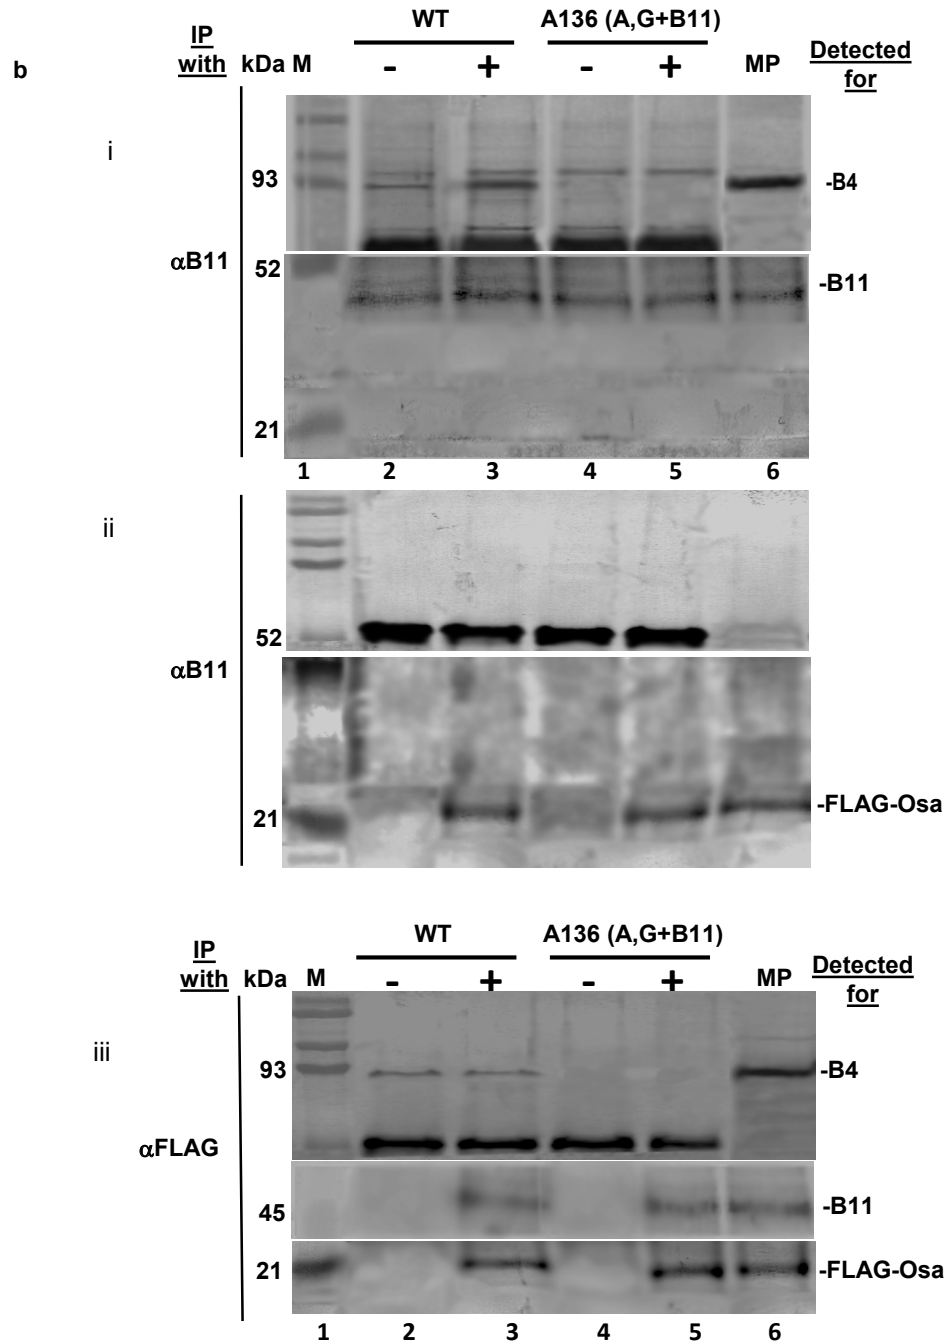

**Supplementary Figure 6b:** Uncropped blots of Fig. 4b showing that Osa interacts with VirB11 independent of T4S machine and VirD4. After blocking, membranes were either retained as a single membrane (ii) or cut into two (i) or three (iii) portions. i) The top and bottom membrane portions were detected for VirB4 and VirB11 respectively. ii) The membrane was detected for FLAG-Osa. Since the IgG heavy chain (used in the experiment) got detected at higher intensity even before FLAG-Osa could be detected, the blot was cut into two halves and the top portion was washed. The bottom portion was over exposed to detect for FLAG-Osa. iii) The top portion was used for detection of VirB4, the middle for detection of VirB11 and the bottom piece for detection of FLAG-Osa.

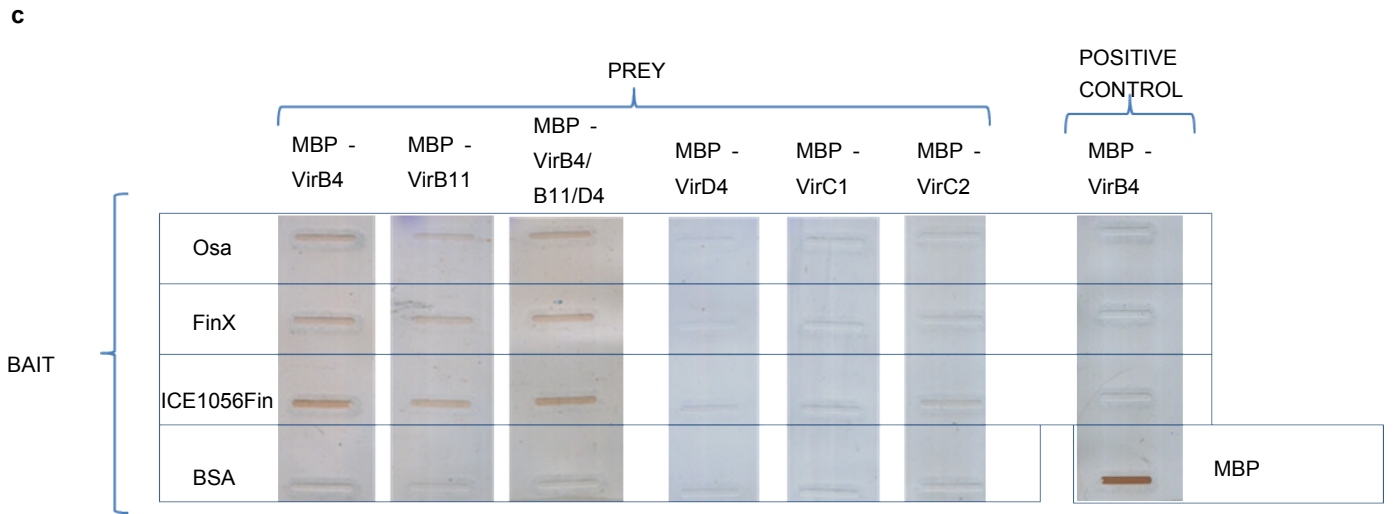

**Supplementary Figure 6c** : Uncropped blots of Fig. 4c showing Osa interacts with VirB4 and VirB11 *in vitro*.

**Supplementary table 1.** Plasmids and strains used in this study.

| No. | Plasmid                                          | Strain                                          | Description                                                                                         |
|-----|--------------------------------------------------|-------------------------------------------------|-----------------------------------------------------------------------------------------------------|
| 1   | pKA165 (pvirB::osa)                              | <i>E. coli</i> DH5 $\alpha$                     | <i>osa</i> cloned under <i>virB</i> promoter, using <i>NdeI/XhoI</i>                                |
| 2   | pKA197                                           | <i>E. coli</i> DH5 $\alpha$                     | <i>FLAG-osa</i> cloned under <i>virB</i> promoter, using <i>NdeI/XhoI</i>                           |
| 3   | pET28b::osa                                      | <i>E. coli</i> DH10 $\beta$ and BL21(DE3) plysS | <i>osa</i> cloned into pET28b(+) under <i>NdeI/XhoI</i> with N-terminal His <sub>6</sub>            |
| 4   | pSoup::osa                                       | <i>A. tumefaciens</i> LBA4404                   | <i>osa</i> cloned under <i>virB</i> promoter using <i>HindIII/KpnI</i>                              |
| 5   | pSoup::osa-K100A                                 | "                                               | <i>osa-K100A</i> cloned under <i>virB</i> promoter using <i>HindIII/KpnI</i>                        |
| 6   | pSoup::osa-R140A                                 | "                                               | <i>osa-R140A</i> cloned under <i>virB</i> promoter using <i>HindIII/KpnI</i>                        |
| 7   | pSoup::osa-KR (100A-R140A)                       | "                                               | <i>osa-K100A-R140A</i> cloned under <i>virB</i> promoter using <i>HindIII/KpnI</i>                  |
| 8   | pSoup::osa-penta (D98A-K100A-D136A-T139A-R140A)  | "                                               | <i>osa-D98A-K100A-D136A-T139A-R140A</i> cloned under <i>virB</i> promoter using <i>HindIII/KpnI</i> |
| 9   | pSoup::fiwA                                      | "                                               | <i>fiwA</i> cloned under <i>virB</i> promoter using <i>HindIII/KpnI</i>                             |
| 10  | pSoup::ICE1056Fin                                | "                                               | <i>ice1056fin</i> cloned under <i>virB</i> promoter using <i>HindIII/KpnI</i>                       |
| 11  | pSoup::fipA                                      | "                                               | <i>fipA</i> cloned under <i>virB</i> promoter using <i>HindIII/KpnI</i> sites                       |
| 12  | pSoup::pifC                                      | "                                               | <i>pifC</i> cloned under <i>virB</i> promoter using <i>HindIII/KpnI</i> sites                       |
| 13  | pET28a::ice1056fin                               | <i>E. coli</i> BL21CodonPlus                    | Ice1056Fin in pET28a, under <i>NcoI/XhoI</i> sites with C-His <sub>6</sub> tag                      |
| 14  | pETM41::osa-                                     | <i>E. coli</i> Rosetta (DE3) pLysS              | MBP tagged Osa in pETM41 under <i>NcoI/BamHI</i>                                                    |
| 15  | pETM41::osa-K100A                                | <i>E. coli</i> Rosetta (DE3) pLysS              | MBP tagged Osa-K100A in pETM41 under <i>NcoI/KpnI</i>                                               |
| 16  | pETM41::osa-R140A                                | "                                               | MBP tagged Osa-R140A in pETM41 under <i>NcoI/KpnI</i>                                               |
| 17  | pETM41::osa-KR (K100A-R140A)                     | "                                               | MBP tagged Osa-K100A-R140A in pETM41 under <i>NcoI/KpnI</i>                                         |
| 18  | pETM41::osa-penta (D98A-K100A-D136A-T139A-R140A) | "                                               | MBP tagged Osa-K100A-R140A-D136A-T139A-R140A in pETM41 under <i>NcoI/KpnI</i>                       |
| 19  | pETM41::virC1                                    | <i>E. coli</i> T7 Express I <sup>q</sup>        | MBP tagged VirC1 in pETM41 under <i>NcoI/KpnI</i>                                                   |
| 20  | pETM41::virC2                                    | "                                               | MBP tagged VirC2 in pETM41 under <i>NcoI/KpnI</i>                                                   |

|           |                     |                                                |                                                                     |
|-----------|---------------------|------------------------------------------------|---------------------------------------------------------------------|
| <b>21</b> | InfR-Co::virD2      | <i>E. coli</i> Rosetta (DE3) pLysS             | VirD2 in InfR-Co in the second cassette with C-His <sub>6</sub> tag |
| <b>22</b> | pETM41::Δ1-86virD4  | ”                                              | MBP tagged VirD4 (87-543) in pETM41 under <i>NcoI/KpnI</i>          |
| <b>23</b> | pETM41::Δ1-424virB4 | <i>E. coli</i> T7 Express <i>I<sup>q</sup></i> | MBP tagged VirB4 (425-743) in pETM41 under <i>NcoI/KpnI</i>         |
| <b>24</b> | pETM41::virB11      | <i>E. coli</i> Rosetta (DE3) pLysS             | MBP tagged VirB11 in pETM41 under <i>NcoI/KpnI</i>                  |
| <b>25</b> | InfR-Co::P1 parB    | <i>E. coli</i> T7 Express <i>I<sup>q</sup></i> | His <sub>6</sub> -tagged P1 ParB in InfR-Co first cassette          |
| <b>26</b> | InfR-Co::RK2 korB   | <i>E. coli</i> Rosetta (DE3) pLysS             | His <sub>6</sub> -tagged RK2 KorB in InfR-Co first cassette         |

pETM41 was obtained from EMBL protein expression and purification core facility. InfR-Nhis, InfR-Chis and InfR-Co are in-house modified vectors from pRSF-Duet1 (Novagen) containing In-Fusion (Cloneteck) cloning cassettes. InfR-Nhis and InfR-Chis both have an In-Fusion cloning cassette with TEV protease cleavable His<sub>6</sub>-tag at the N and C-terminus, respectively. InfR-Co has two In-Fusion cassettes with both TEV protease cleavable N-terminal His<sub>6</sub>-tag in the first cassette and C-terminal His<sub>6</sub>-tag in the second cassette.

**Supplementary table 2.** List of oligos used in this study.

| <b>Primer</b>                      | <b>Sequence</b>                       | <b>Purpose</b>                                                                                                                          |
|------------------------------------|---------------------------------------|-----------------------------------------------------------------------------------------------------------------------------------------|
| osa-R140A-FP                       | GGCATGACCGCTTCAATGTGG                 | To generate <i>osa-R140A</i>                                                                                                            |
| osa-R140A-RP                       | ATCAGTGAAACACACCGCGAAA<br>TG          | "                                                                                                                                       |
| osa-K100A-FP                       | AAAGACCGGGCATATCCGTCG                 | To generate <i>osa-K100A</i> mutant and<br><i>osa-K100A-R140A</i> mutant                                                                |
| osa-K100A-RP                       | AGGCATGTCCTGCTTCAACGG                 | "                                                                                                                                       |
| osa-D98A-<br>InK100A-FP            | ATGCCTAAAGCCCGGGCATAT                 | To generate <i>osa-D98A-K100A-<br/>R140A</i> from <i>Osa-K100A-R140A</i>                                                                |
| osa-D98A-<br>InK100A-RP            | GTCCTGCTTCAACGGGCAGGC                 | "                                                                                                                                       |
| osa-D136A-<br>T139A-InR140A-<br>FP | TTCACTGCTGGCATGGCCGCTTC<br>A          | To generate <i>osa-D98A-K100A-<br/>D136A-T139A-R140A</i> from <i>osa-<br/>D98A-K100A-R140A</i>                                          |
| osa-D136A-<br>T139A-InR140A-<br>RP | ACACACCGCGAAATGGCCCAGA<br>AT          | "                                                                                                                                       |
| fiwA-FP                            | AGACCATGGCTATGCTGACACG<br>GTTGAAG     | PCR amplification of <i>fiwA</i> from<br>pRP4* and cloning into pAK165                                                                  |
| fiwA-RP                            | AGACTCGAGTTATCAGAGTCCG<br>CGGCCTTT    | "                                                                                                                                       |
| fipA-FP                            | AGACCATGGCTATGATGGAGCA<br>GATCGAC     | PCR amplification of <i>fipA</i> from<br>pKM101+ and cloning into pAK165                                                                |
| fipA-RP                            | AGACTCGAGTTATCACAGTGTA<br>AGCAGGCG    | "                                                                                                                                       |
| ice1056fin-FP                      | AGACCATGGCTATGATAAAACT<br>GACCCCT     | PCR amplification of <i>ice1056fin</i><br>from <i>ICEHin1056<sup>#</sup></i> and cloning into<br>pAK165                                 |
| ice1056fin-RP                      | AGACTCGAGTTATTACAAGGGG<br>TATTTTCTCC  | "                                                                                                                                       |
| pifC-FP                            | AGACCATGGCTATGATGCTAAG<br>CCAGCTT     | PCR amplification of <i>pifC</i> of<br>plasmid F' from <i>E. coli</i> Rosetta-<br>gami (DE3) plysS<br>(Novagen) and cloning into pAK165 |
| pifC-RP                            | AGAGTCGACTTATTACAGATCT<br>CCGTACAGGC  | "                                                                                                                                       |
| ice1056fin -<br>pET28a-FP          | AGACCATGGCTATGATAAAACT<br>GACCCCT     | PCR amplification of <i>ice1056fin</i><br>from <i>ICEHin1056</i> and cloning into<br>pET28a                                             |
| ice1056fin -<br>pET28a-RP          | AGACTCGAGCAAGGGGTATTTT<br>TCTCC       | "                                                                                                                                       |
| VirD4 (87-543)<br>NhisFP           | TACTTCCAGTCCATGGGACTGC<br>GCAATCAGAAG | <i>virD4</i> cloning into InfR-Co<br>for overexpression and purification                                                                |
| VirD4 (87-543)                     | AGAGTTATCAACATATGTTATTA               | "                                                                                                                                       |

|                                |                                                                                                                               |                                                                                                                           |
|--------------------------------|-------------------------------------------------------------------------------------------------------------------------------|---------------------------------------------------------------------------------------------------------------------------|
| NhisRP                         | CTGGCGTTCAAAAAGC                                                                                                              |                                                                                                                           |
| VirB4 (425-743)<br>NhisFP      | TACTTCCAGTCCATGGATGTTGG<br>CATGACGG                                                                                           | <i>virB4</i> cloning into InfR-Co for<br>for overexpression and purification                                              |
| VirB4 (425-743)<br>NhisRP      | AGAGTTATCAACATATGTTATTA<br>CCGCAGATCAAATTC                                                                                    | "                                                                                                                         |
| VirB11NhisNcoIF<br>P           | TACTTCCAGTCCATGGAAGTGG<br>ATCCGCAACTAC                                                                                        | <i>virB11</i> cloning into InfR-Co for<br>for overexpression and purification                                             |
| VirB11NhisNdeIR<br>P           | AGAGTTATCAACATATGTTATTG<br>ATTTAGGAGATCGCC                                                                                    | "                                                                                                                         |
| VirC1NhisNco1FP                | TACTTCCAGTCCATGGCTCAACT<br>TTTGACGTTTTGCTC                                                                                    | <i>virC1</i> cloning into InfR-Nhis for<br>for overexpression and purification                                            |
| VirC1NhisNde1RP                | AGAGTTATCAACATATGTTATTA<br>AGCCTCCAAGATTT                                                                                     | "                                                                                                                         |
| VirC2 NhisNco1FP               | TACTTCCAGTCCATGGCAATTCG<br>CAAGCCCGCGTT                                                                                       | <i>virC2</i> cloning into InfR-Nhis for<br>for overexpression and purification                                            |
| VirC2 NhisNde1RP               | AGAGTTATCAACATATGTTATTA<br>CCAATTCCTCGATG                                                                                     | "                                                                                                                         |
| VirD2<br>NhisNco1FP            | TACTTCCAGTCCATGGCTCCCGA<br>TCGCGCTCAAGTA                                                                                      | <i>virD2</i> cloning into InfR-Co for<br>for overexpression and purification                                              |
| VirD2<br>NhisNde1RP            | AGAGTTATCAACATATGTTATTA<br>GGTCCCCCGCGCC                                                                                      | "                                                                                                                         |
| Osa NcoI FP                    | TTTCAGGGCGCCATGGCTTTGCT<br>ACGGCGGCGGTGTCG                                                                                    | <i>Osa, osa-K100A, osa-R140A, osa-<br/>RK and osa-penta</i> cloning into<br>pETM41 for overexpression and<br>purification |
| Osa BamHI RP                   | GCTCGAATTCGGATCCCTAGAT<br>CTTCCTGCATTGCTCA                                                                                    | "                                                                                                                         |
| P1ParB<br>NcoInhisFP           | TACTTCCAGTCCATGGCTTCAA<br>GAAAAC                                                                                              | <i>p1parB</i> cloning into InfR-Co for<br>for overexpression and purification                                             |
| P1ParB<br>KpnINhisRP           | GTTAATTA ACTCGAGGGTACCT<br>CAAGGCTTCGGCT                                                                                      | "                                                                                                                         |
| KorB NcoINhisFP                | TACTTCCAGTCCATGGCTACTGC<br>GGCTCAAG                                                                                           | <i>rk2korB</i> cloning into InfR-Co for<br>for overexpression and purification                                            |
| KorB KpnINhisRP                | GTTAATTA ACTCGAGGGTACCT<br>CAGCCCTCGATGAGC                                                                                    | "                                                                                                                         |
| FLAG-Osa-FP                    | GCGCTAACGATGCATATGGATT<br>ACAAGGATGACGATGACAAGTT<br>GCTACGGCGG                                                                | For <i>in vivo</i> protein-protein<br>interaction studies                                                                 |
| FLAG-Osa-RP                    | AAAGCGCAGGGACTCGAGTCAC<br>TATTCTAGAATCTTCCTGCATTG                                                                             | "                                                                                                                         |
| 90-mer oligo with<br>RB and LB | TTGGCAGGATATATTGTGGTGT<br>AAACATTGTCGTTTCCCGCCTTC<br>AGTTTAAACTATCAGTGTTTGAC<br>AGGATATATTGGCGGGTAAACC<br>TAAGAGAAAAGAGCGTTTA | For ssDNA nuclease assays, and for<br>T-DNA-VirD2 complex preparation                                                     |

\*DSM collection No. 3876, †DSM collection No. 9496, #Integrative Conjugative Element ICEHin1056 isolated from *Haemophilus influenzae*. DSM - Leibniz Institute DSMZ-German Collection of Microorganisms and Cell Cultures ([www.dsmz.de](http://www.dsmz.de)).

**Supplementary table 3.** Composition of buffers used for protein purification.

| Name of the buffer          | Buffer composition | pH  | NaCl (mM) | Imidazole (mM) | $\beta$ ME (mM) | DTT (mM) | Glycerol (%) | PMSF (mM) |
|-----------------------------|--------------------|-----|-----------|----------------|-----------------|----------|--------------|-----------|
| Lysis buffer 1 <sup>*</sup> | 50 mM Tris-HCl     | 8.0 | 500       |                | 3               |          |              | 1         |
| Lysis buffer 2 <sup>#</sup> | 25 mM Tris-HCl     | "   | 150       |                | 2               |          | 10           | 1         |
| A                           | "                  | "   | 500       | 10             | 2               |          |              |           |
| B                           | "                  | "   | "         | 500            | 2               |          |              |           |
| C                           | "                  | "   | 200       |                | 5               |          |              |           |
| D                           | "                  | "   | 750       |                |                 | 2        |              |           |
| E                           | "                  | "   | 500       |                | 5               |          |              |           |
| F <sup>@</sup>              | "                  | "   | 1000      |                | 5               |          |              |           |
| G                           | "                  | "   | 500       |                |                 | 2        |              |           |
| H <sup>\$</sup>             | 20 mM Tris-HCl     | 7.4 | 100       |                |                 |          |              |           |
| I                           | 25 mM Tris-HCl     | 8.0 | 10        |                |                 | 2        |              |           |
| J                           | "                  | "   | 1000      |                |                 | 2        |              |           |
| K                           | 50 mM Tris-HCl     | "   | 300       | 10             |                 |          | 10           | 1         |
| L                           | 50 mM Tris-HCl     | "   | "         | 1000           |                 |          | 10           | 1         |
| M                           | 50 mM Na-phosphate | "   | 50        |                |                 |          | 10           |           |
| N                           | 50 mM Na-phosphate | "   | 1000      |                |                 |          | 10           |           |

\*-contains 1 mM Benzamidine-HCl, <sup>#</sup>-contains 1 mM Benzamidine-HCl, 10  $\mu$ g/ml DNase I and 100  $\mu$ g/ml Hen Egg White Lysozyme, <sup>@</sup>-contains 20 mM D-maltose, <sup>\$</sup>-contains 1 mM EDTA.
